# Supplementary material for: The Synergistic Impact of Crystal Seed and Fluoride Ion in the Synthesis of Silicalite-1 Zeolite in Low-Template Systems
Source: MDPI journal article supplement (doi:10.3390/ma17010266), 2024-01-04

**Supplementary Information for**

**The synergistic impact of crystal seed and fluoride ion in the**

**synthesis of Silicalite-1 zeolite in low-template system**

Xiaojing Meng <sup>1,\*</sup>, Yanjie Qin <sup>1</sup>, Yang Zhang <sup>1</sup>, Min Li <sup>1</sup>, Huibang Huang <sup>1</sup>, Jiaqin Peng <sup>1</sup>, Liangxu Zhou <sup>1</sup>, Jian Feng <sup>1</sup>

(1. College of Chemistry and Chemical Engineering, Chongqing University of Science and Technology, Chongqing 401331, China.\* Corresponding author)

E-mail address: [mengxiaojing88@126.com](mailto:mengxiaojing88@126.com)

## Figure Captions

**Figure S1.** XRD patterns of Silicalite-1 zeolites with different F/Si ratios: (a) 0, (b) 0.06, (c) 0.1, (d) 0.15, (e) 0.2.

**Figure S2.** SEM images of Silicalite-1 zeolites with different F/Si ratios: (a) 0, (b) 0.06, (c) 0.1, (d) 0.15, (e) 0.2, (f) 0.2 (High magnification).

**Figure S3.** XRD patterns of Silicalite-1 zeolites with different S-1 seeds contents: (a) 1 wt%, (b) 5 wt%, (c) 10 wt%, (d) 20 wt%, with a F/Si = 0.1.

**Figure S4.** High-resolution SEM images of Silicalite-1 zeolites with a F/Si of 0.1 under different S-1 seeds contents: (a) 1 wt%, (b) 5 wt%, (c) 10 wt%, and (d) 20 wt%.

**Figure S5.** XRD patterns of Silicalite-1 zeolites (S-1 seeds = 10 wt%) with different F/Si ratios: (a) 0.03, (b) 0.05, (c) 0.1, (d) 0.3, (e) 0.4.

**Figure S6.** SEM images of Silicalite-1 zeolites with different F/Si ratios: (a) 0.03, (b) 0.05, (c) 0.3, and (d) 0.4, with S-1 seeds = 10 wt%.

**Figure S7.** SEM images of Silicalite-1 zeolites with different crystallization time in the system containing  $\text{NH}_4\text{F}$  alone: (a) 2 h, (b) 4 h, (c) 6 h.

**Figure S8.** SEM images of Silicalite-1 zeolites with different crystallization time in the system containing S-1 seeds alone: (a) 2 h, (b) 4 h, (c) 6 h.

**Figure S9.** XRD patterns of Silicalite-1 zeolites with different crystallization time in the system containing  $\text{NH}_4\text{F}$  and S-1 seeds: (a) 12 h, (b) 24 h, (c) 48 h.

Figure S1.

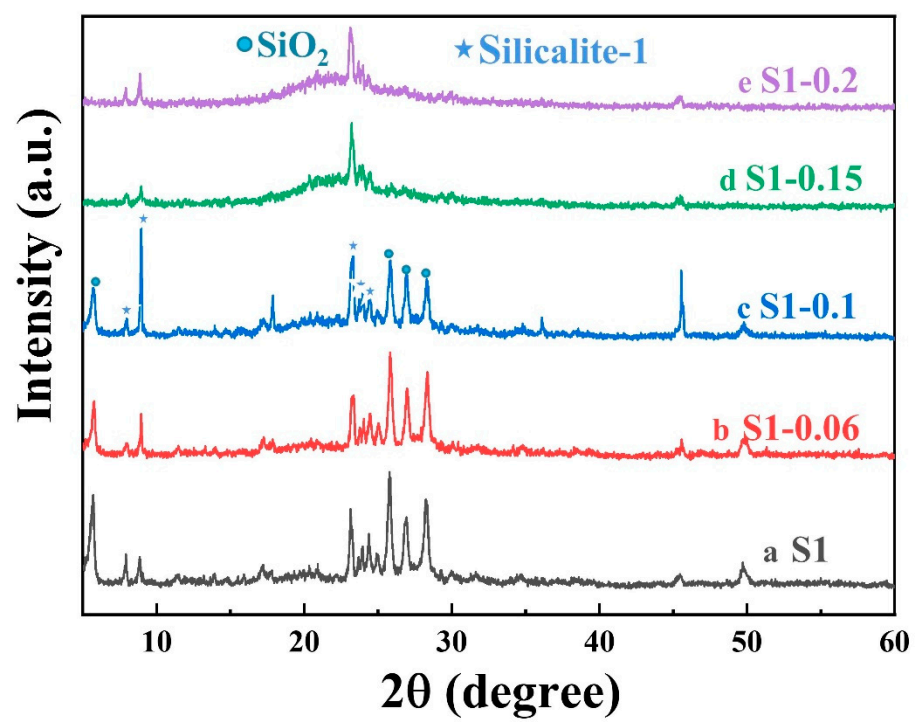

**Figure S2.**

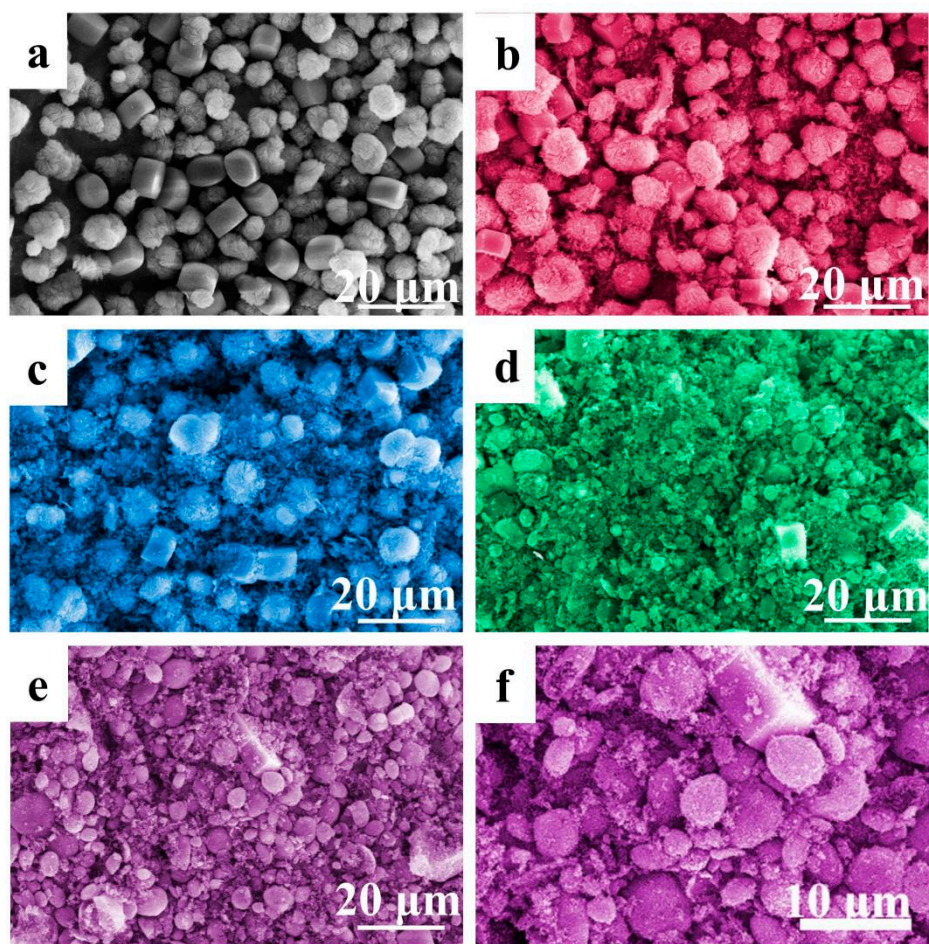

Figure S3.

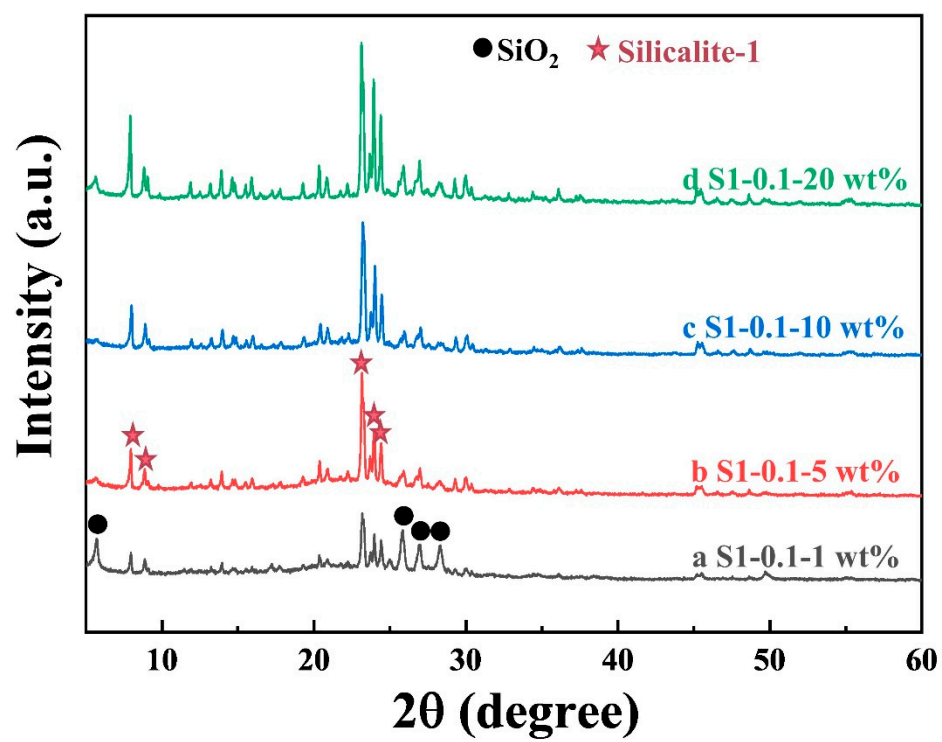

**Figure S4.**

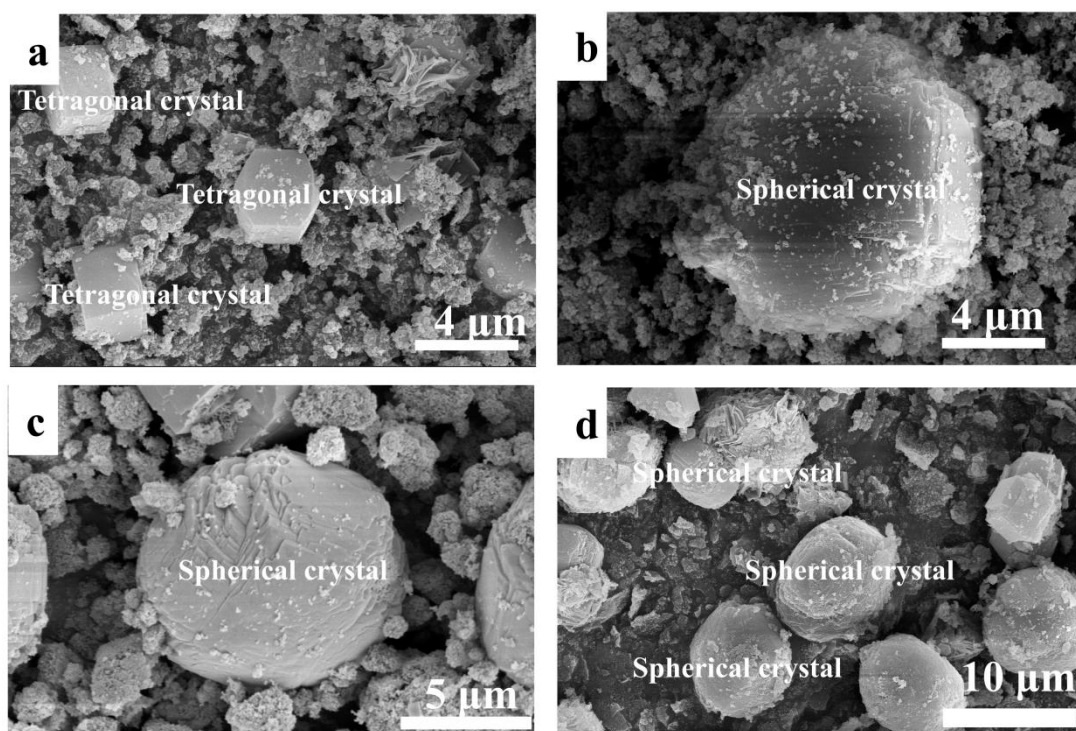

Figure S5.

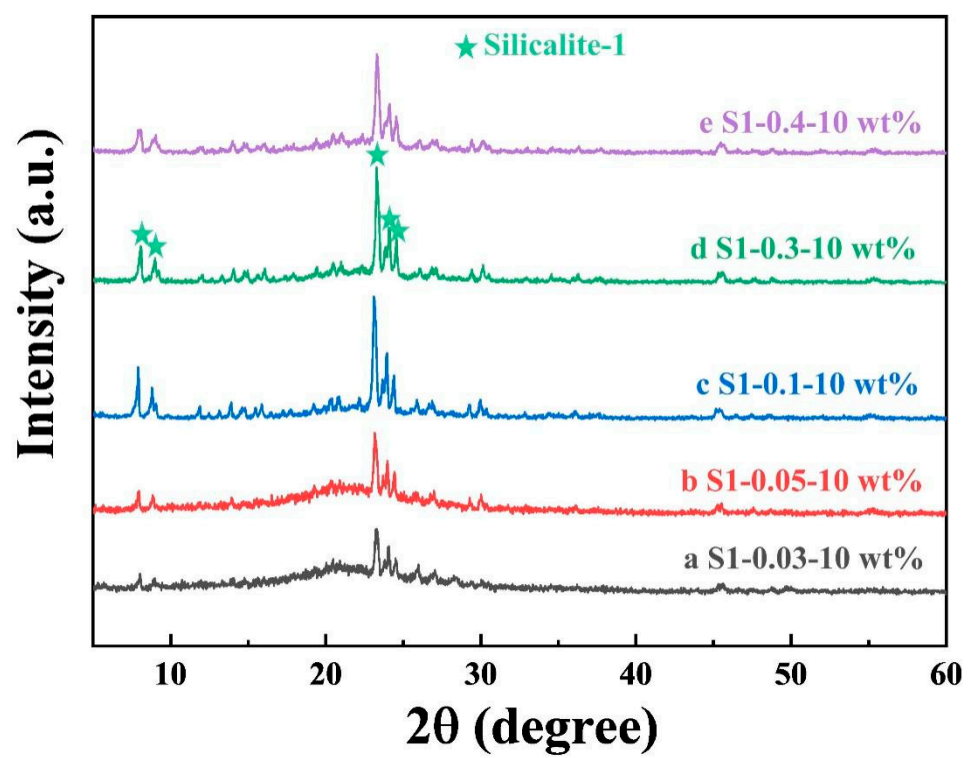

**Figure S6.**

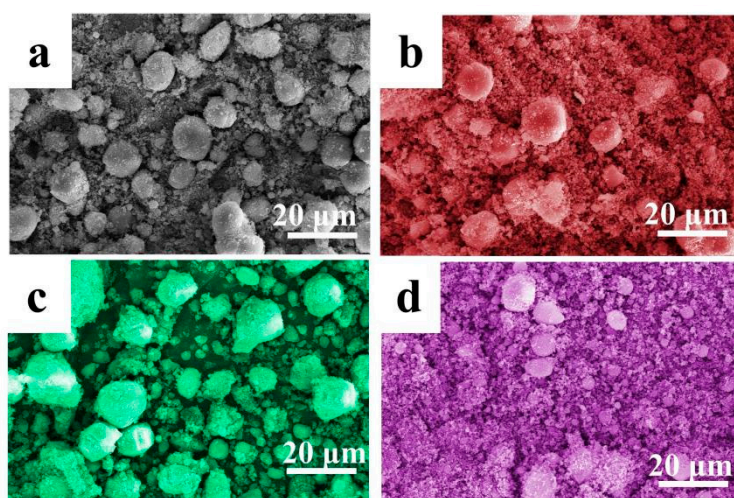



**Figure S7.**

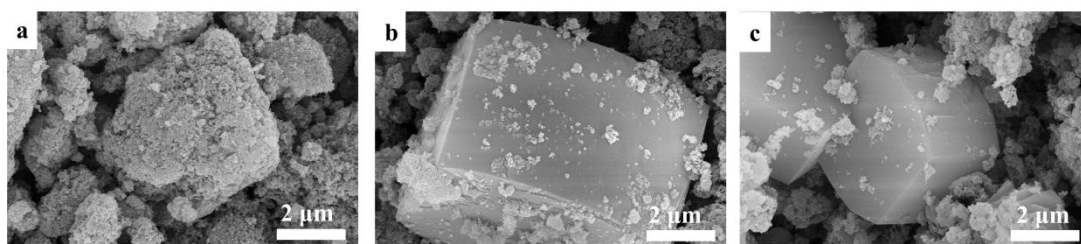

**Figure S8.**

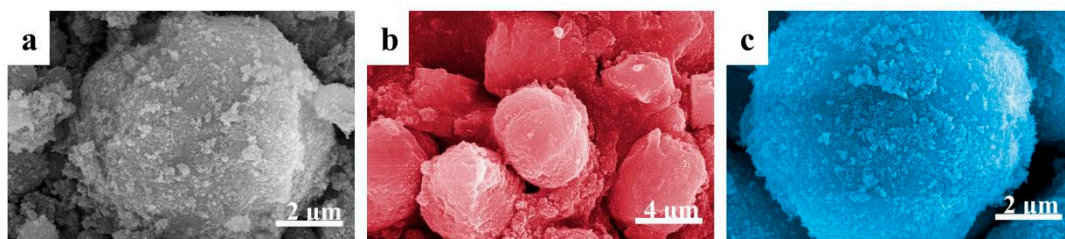

Figure S9.

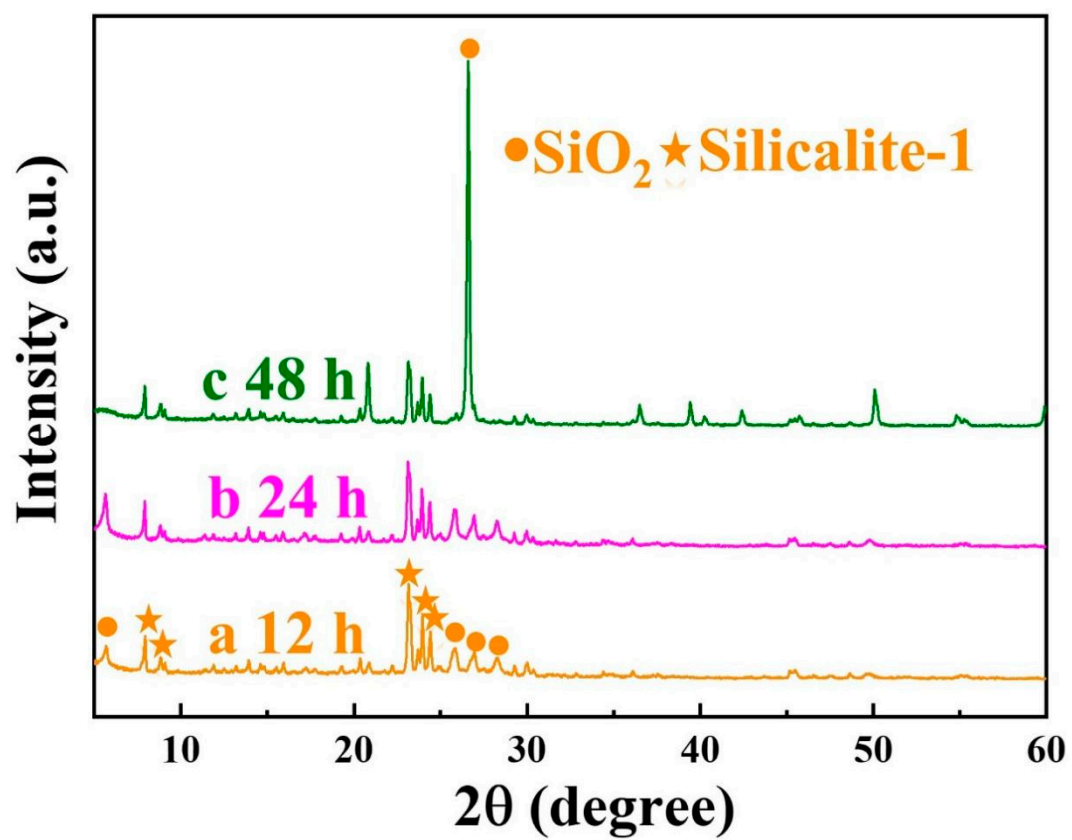

Supplement: s1 [file s1]
